# Supplementary material
Source: MDPI journal article supplement (https://www.mdpi.com/2079-6412/8/11/379)
Supplement: s1 [file s1]

## Supplementary Materials

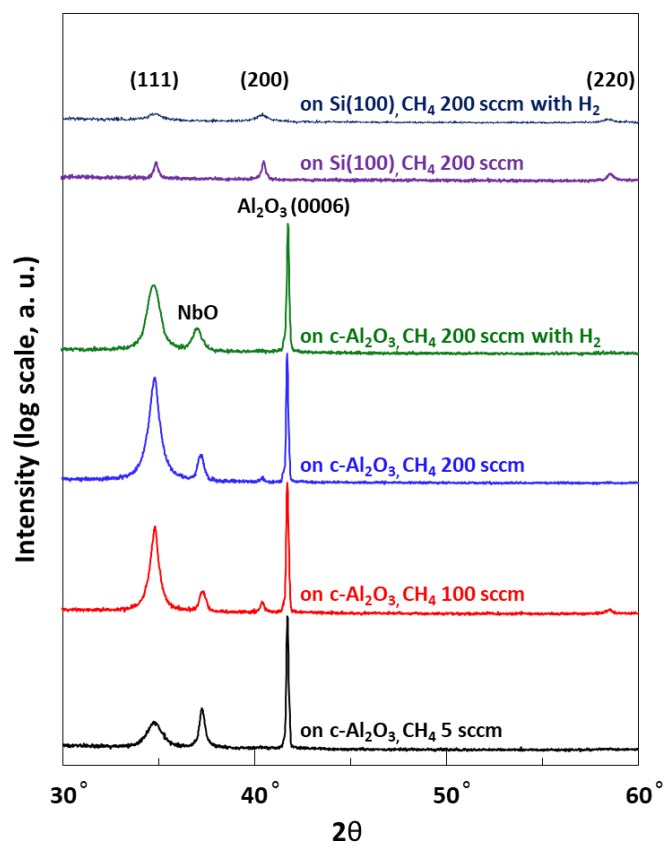

**Figure S1.** XRD patterns (logarithmic scale) of NbC films grown at different conditions.

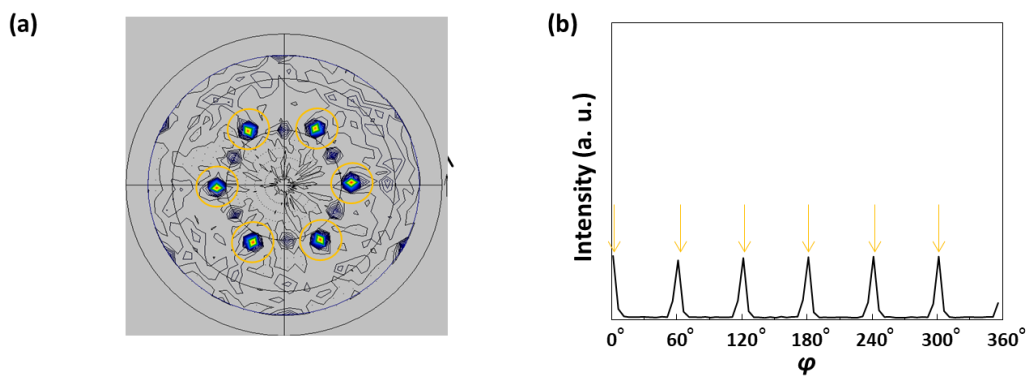

**Figure S2.** (a) X-ray pole figure of the NbC/*c*-sapphire system measured at a  $2\theta$  angle of  $58.34^\circ$  for the NbC (220) peak; (b) azimuthal ( $\phi$ ) scan data measured at a  $\chi$  angle of  $35^\circ$ .

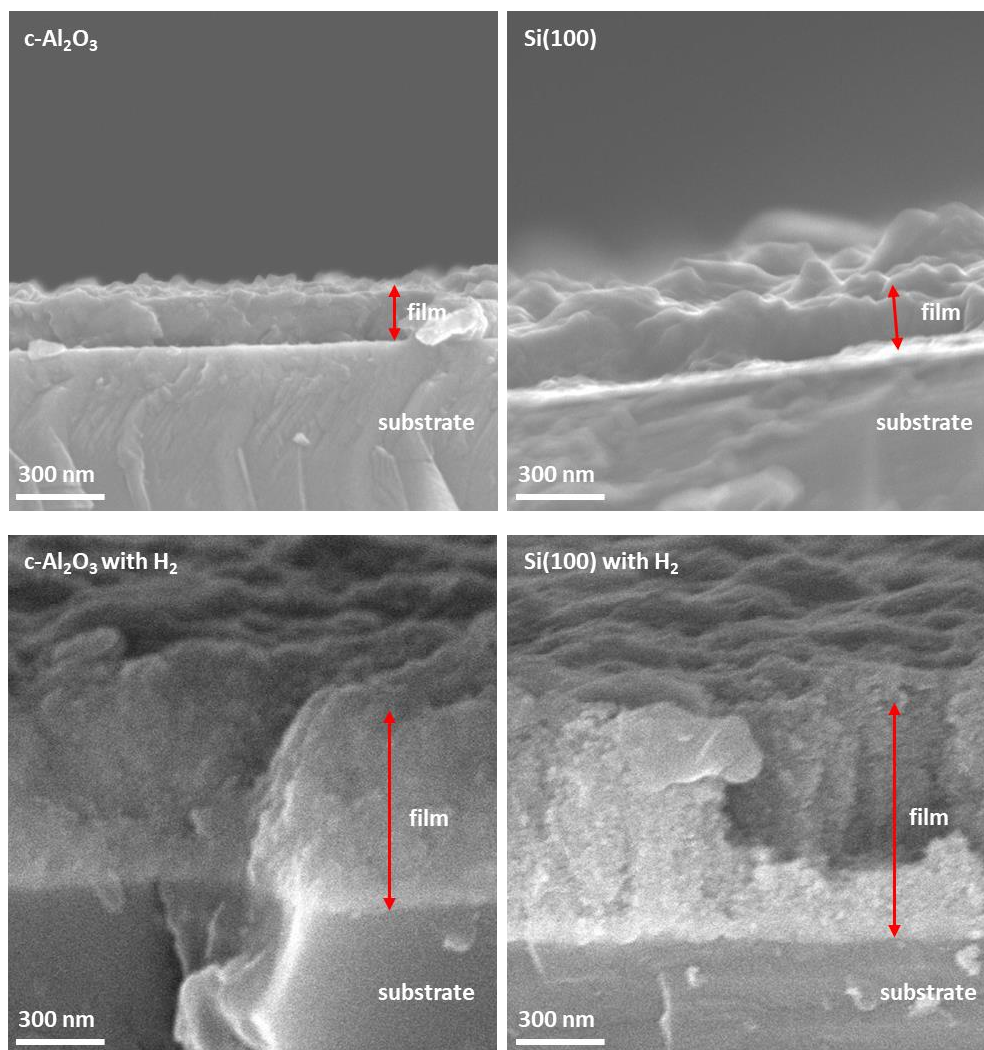

**Figure S3.** Cross-sectional SEM images of NbC films.
